# Supplementary material for: Determination of Genotype Combinations That Can Predict the Outcome of the Treatment of Alcohol Dependence Using the 5-HT3 Antagonist Ondansetron
Source: Atypon-hosted journal article supplement (doi:10.1176/appi.ajp.2013.12091163), 2013-07-30
Supplement: 1020_ds001.pdf [file 1020_ds001.pdf]

**TABLE S1. Biological Information on *SLC6A4*, *HTR3B*, and *HTR3A* Polymorphisms Examined in This Study<sup>a</sup>**

| Gene          | SNP No. | dbSNP ID   | Location Within the Gene | Chromosomal Location                  | Alleles | Minor Allele Frequency (Minor Allele) <sup>b</sup> | p values for Deviation from Hardy-Weinberg Equilibrium <sup>c</sup> |               | Primers and Probe Sequences / Context Sequence ID of ABI Primers and Probes |
|---------------|---------|------------|--------------------------|---------------------------------------|---------|----------------------------------------------------|---------------------------------------------------------------------|---------------|-----------------------------------------------------------------------------|
|               |         |            |                          |                                       |         |                                                    | OND Group                                                           | Placebo Group |                                                                             |
| <i>SLC6A4</i> | 1       | 5'-HTTLPR  | promoter                 | 25,588,443 to 25,588,485 <sup>d</sup> | L/S     | 0.450 (S)                                          | 1.000                                                               | 0.779         | Forward:<br>TCCTCCGCTTTGGCGCCTCTTCC<br>Reverse:<br>TGGGGGTTGCAGGGGAGATCCTG  |
|               | 2       | rs1042173  | 3'-UTR                   | 25,549,137                            | T/G     | 0.425 (G)                                          | 0.790                                                               | 0.930         | C_7473190_10                                                                |
| <i>HTR3A</i>  | 3       | rs1150226  | 5'-near gene             | 113,350,751                           | G/A     | 0.058 (A)                                          | 0.545                                                               | 0.675         | C__7488474_10                                                               |
|               | 4       | rs1062613  | 5'-UTR                   | 113,351,216                           | C/T     | 0.214 (T)                                          | 0.989                                                               | 0.258         | C__7488465_10                                                               |
|               | 5       | rs33940208 | Exon 1(L168L)            | 113,351,287                           | C/T     | not reported (T=0.017 <sup>e</sup> )               | 1.000                                                               | 1.000         | C__22275584_10                                                              |
|               | 6       | rs1176722  | Intron 1                 | 113,353,684                           | A/G     | 0.159 (A)                                          | 0.793                                                               | 0.645         | C__7488431_10                                                               |
|               | 7       | rs1176720  | Intron 2                 | 113,354,963                           | C/G     | 0.186 (G)                                          | 0.678                                                               | 1.000         | C__1646939_10                                                               |
|               | 8       | rs2276302  | Intron 3                 | 113,355,350                           | A/G     | 0.319 (G)                                          | 1.000                                                               | 0.061         | C__1646938_1_                                                               |
|               | 9       | rs1176719  | Intron 4                 | 113,357,397                           | A/G     | not reported (A=0.258 <sup>e</sup> )               | 0.365                                                               | 0.878         | C__1372135_1_                                                               |
|               | 10      | rs10160548 | Intron 5                 | 113,361,891                           | G/T     | 0.341 (G)                                          | 0.356                                                               | 0.255         | C__1372126_10                                                               |
|               | 11      | rs1150220  | Intron 7                 | 113,363,096                           | C/T     | not reported (T=0.233 <sup>e</sup> )               | 1.000                                                               | 0.525         | C__7488415_1_                                                               |
|               | 12      | rs1176713  | Exon 8 (L459L)           | 113,365,635                           | G/A     | 0.257 (G)                                          | 1.000                                                               | 0.835         | C__1372122_10                                                               |
| <i>HTR3B</i>  | 13      | rs3758987  | 5'-near gene             | 113,280,485                           | T/C     | 0.252 (C)                                          | 0.746                                                               | 0.452         | C__27512451_10                                                              |
|               | 14      | rs11606194 | Intron 2                 | 113,286,191                           | T/C     | 0.097 (C)                                          | 0.766                                                               | 1.000         | C__26324626_10                                                              |
|               | 15      | rs4938056  | Intron 2                 | 113,291,749                           | C/T     | 0.376 (T)                                          | 0.615                                                               | 0.240         | C__3053567_10                                                               |
|               | 16      | rs12270070 | Intron 2                 | 113,304,257                           | G/C     | 0.226 (C)                                          | 0.325                                                               | 0.587         | C__3053563_10                                                               |
|               | 17      | rs1176746  | Intron 4                 | 113,307,811                           | G/A     | 0.425 (A)                                          | 0.154                                                               | 0.354         | C__7488605_10                                                               |

|    |            |                   |             |     |           |       |       |                |
|----|------------|-------------------|-------------|-----|-----------|-------|-------|----------------|
| 18 | rs1176744  | Exon 5<br>(Y129S) | 113,308,238 | A/C | 0.292 (C) | 0.972 | 0.437 | C__7488596_1_  |
| 19 | rs2276307  | Intron 6          | 113,309,097 | A/G | 0.226 (G) | 0.821 | 0.870 | C__1646949_1_  |
| 20 | rs1672717  | Intron 6          | 113,317,943 | A/G | 0.425 (G) | 1.000 | 1.000 | C__3053558_10  |
| 21 | rs17614942 | Intron 8          | 113,321,587 | C/A | 0.049 (A) | 0.987 | 1.000 | C__32983576_10 |

<sup>a</sup> All chromosomal locations are in reference to: NC\_000017.9 for *SLC6A4*, NM\_006028.3 for *HTR3B*, and NM\_213621.1 for *HTR3A*.

SNP=single-nucleotide polymorphism; ABI=Applied Biosystems (Foster City, CA); OND=ondansetron.

<sup>b</sup> From HapMap CEU (European ancestry) sample.

<sup>c</sup> Data from this study.

<sup>d</sup> Reference citation: Garcia LF, Aluja A, Fibla J, Cuevas L, Garcia O: Incremental effect for antisocial personality disorder genetic risk combining 5-HTTLPR and 5-HTTVNTR polymorphisms. *Psychiatry Res* 2010; 177:161–166.

<sup>e</sup> pilot\_1\_CEU\_low\_coverage\_panel.

**TABLE S2. Mean Drinks per Drinking Day Estimates in All Examined Genotype Groups<sup>a</sup>**

| Gene         | SNP        | Genotype | DDD in Ondansetron Group |        |       |      | DDD in Placebo Group |        |       |       | Ondansetron vs. Placebo Comparison |        |       |                            |                  |                                           |
|--------------|------------|----------|--------------------------|--------|-------|------|----------------------|--------|-------|-------|------------------------------------|--------|-------|----------------------------|------------------|-------------------------------------------|
|              |            |          | Estimate                 | 95% CI |       | N    | Estimate             | 95% CI |       | N     | Estimate                           | 95% CI |       | p-Value for DDD Difference | FDR <sup>b</sup> | p-Value for Genotype Frequency Difference |
|              |            |          |                          | Lower  | Upper |      |                      | Lower  | Upper |       |                                    | Lower  | Upper |                            |                  |                                           |
| <i>HTR3A</i> | rs1150226  | AG       | 4.18                     | 2.91   | 5.44  | 20   | 6.00                 | 4.84   | 7.16  | 24    | -1.82                              | -3.53  | -0.12 | 0.036                      | 0.311            | 0.968                                     |
|              |            | GG       | 6.11                     | 5.53   | 6.69  | 113  | 6.04                 | 5.49   | 6.6   | 115   | 0.07                               | -0.68  | 0.81  | 0.859                      |                  | 0.970                                     |
|              | rs1062613  | CC       | 3.70                     | 1.37   | 6.04  | 6    | 4.47                 | 1.62   | 7.32  | 4     | -0.76                              | -4.44  | 2.91  | 0.682                      |                  | 0.474                                     |
|              |            | TC       | 5.21                     | 4.36   | 6.05  | 48   | 6.29                 | 5.5    | 7.07  | 54    | -1.08                              | -2.21  | 0.05  | 0.061                      |                  | 0.416                                     |
|              | rs33940208 | TT       | 6.27                     | 5.61   | 6.92  | 81   | 5.9                  | 5.25   | 6.56  | 82    | 0.36                               | -0.51  | 1.24  | 0.417                      |                  | 0.675                                     |
|              |            | CC       | 5.76                     | 5.19   | 6.34  | 123  | 6.01                 | 5.47   | 6.55  | 126   | -0.24                              | -0.97  | 0.47  | 0.498                      |                  | 0.754                                     |
|              | rs1176722  | CT       | 6.06                     | 4.09   | 8.04  | 12   | 6.12                 | 4.34   | 7.9   | 14    | -0.06                              | -2.30  | 2.19  | 0.962                      |                  | 0.754                                     |
|              |            | AA       | 2.25                     | -2     | 6.51  | 2    | 4.69                 | 1.78   | 7.6   | 4     | -2.43                              | -7.59  | 2.72  | 0.355                      |                  | 0.408                                     |
|              | rs1176720  | AG       | 5.93                     | 4.93   | 6.93  | 36   | 6.51                 | 5.49   | 7.54  | 32    | -0.58                              | -1.98  | 0.82  | 0.415                      |                  | 0.329                                     |
|              |            | GG       | 5.88                     | 5.25   | 6.5   | 94   | 6.01                 | 5.4    | 6.62  | 99    | -0.13                              | -0.95  | 0.68  | 0.749                      |                  | 0.618                                     |
|              |            | CC       | 2.21                     | -2.02  | 6.45  | 2    | 7.55                 | 4.2    | 10.91 | 3     | -5.34                              | -10.76 | 0.08  | 0.053                      |                  | 0.663                                     |
|              | rs2276302  | CG       | 5.85                     | 4.88   | 6.82  | 38   | 6.08                 | 5.12   | 7.04  | 36    | -0.23                              | -1.57  | 1.09  | 0.730                      |                  | 0.578                                     |
|              |            | GG       | 5.83                     | 5.22   | 6.44  | 95   | 5.94                 | 5.34   | 6.54  | 101   | -0.11                              | -0.92  | 0.7   | 0.788                      |                  | 0.861                                     |
|              |            | AA       | 6.13                     | 5.42   | 6.85  | 67   | 6.13                 | 5.35   | 6.9   | 57    | 0.01                               | -1.01  | 1.02  | 0.989                      |                  | 0.423                                     |
|              | rs1176719  | AG       | 5.77                     | 4.97   | 6.57  | 57   | 5.97                 | 5.28   | 6.66  | 73    | -0.20                              | -1.20  | 0.8   | 0.695                      |                  | 0.203                                     |
|              |            | GG       | 3.82                     | 2.05   | 5.59  | 11   | 5.94                 | 4.12   | 7.76  | 10    | -2.12                              | -4.65  | 0.4   | 0.099                      |                  | 0.761                                     |
|              | rs10160548 | AA       | 4.33                     | 2.50   | 6.16  | 11   | 7.65                 | 5.92   | 9.38  | 11    | -3.32                              | -5.78  | -0.86 | 0.008                      | 0.172            | 0.872                                     |
|              |            | AG       | 5.94                     | 5.08   | 6.81  | 46   | 5.22                 | 4.45   | 5.98  | 60    | 0.73                               | -0.38  | 1.83  | 0.197                      |                  | 0.278                                     |
|              |            | GG       | 5.88                     | 5.21   | 6.54  | 78   | 6.46                 | 5.76   | 7.15  | 69    | -0.58                              | -1.49  | 0.34  | 0.215                      |                  | 0.373                                     |
|              |            | GG       | 4.69                     | 3.11   | 6.26  | 14   | 5.73                 | 4.52   | 6.93  | 24    | -1.04                              | -2.97  | 0.89  | 0.289                      |                  | 0.119                                     |
|              |            | GT       | 5.82                     | 5.08   | 6.55  | 68   | 6.25                 | 5.48   | 7.02  | 59    | -0.44                              | -1.45  | 0.58  | 0.400                      |                  | 0.088                                     |
| rs1150220    | TT         | 6.01     | 5.21                     | 6.81   | 53    | 5.88 | 5.1                  | 6.66   | 57    | 0.13  | -0.95                              | 1.21   | 0.811 |                            | 0.641            |                                           |
|              | AA         | 2.69     | -0.46                    | 5.84   | 4     | 6.79 | 4.25                 | 9.33   | 5     | -4.10 | -8.15                              | -0.06  | 0.047 |                            | 0.833            |                                           |
|              |            | AG       | 5.60                     | 4.66   | 6.53  | 40   | 5.91                 | 5.1    | 6.71  | 52    | -0.31                              | -1.5   | 0.87  | 0.610                      |                  | 0.615                                     |

**TABLE S2. Continued**

| Gene         | SNP        | Genotype | DDD in Ondansetron Group |        |       |     | DDD in Placebo Group |        |       |     | Ondansetron vs. Placebo Comparison |        |       |                            |                  |                                           |
|--------------|------------|----------|--------------------------|--------|-------|-----|----------------------|--------|-------|-----|------------------------------------|--------|-------|----------------------------|------------------|-------------------------------------------|
|              |            |          | Estimate                 | 95% CI |       | N   | Estimate             | 95% CI |       | N   | Estimate                           | 95% CI |       | p-Value for DDD Difference | FDR <sup>b</sup> | p-Value for Genotype Frequency Difference |
|              |            |          |                          | Lower  | Upper |     |                      | Lower  | Upper |     |                                    | Lower  | Upper |                            |                  |                                           |
|              |            | GG       | 5.96                     | 5.34   | 6.58  | 91  | 5.95                 | 5.3    | 6.6   | 82  | 0.01                               | -0.85  | 0.86  | 0.983                      |                  | 0.365                                     |
|              | rs1176713  | GG       | 4.43                     | 1.94   | 6.93  | 6   | 8.34                 | 6.45   | 10.23 | 9   | -3.91                              | -6.99  | -0.82 | 0.013                      | 0.172            | 0.511                                     |
|              |            | AG       | 5.45                     | 4.58   | 6.32  | 46  | 5.58                 | 4.79   | 6.36  | 57  | -0.13                              | -1.25  | 0.99  | 0.824                      |                  | 0.837                                     |
|              |            | AA       | 6.05                     | 5.4    | 6.7   | 82  | 6.06                 | 5.38   | 6.74  | 73  | -0.01                              | -0.91  | 0.89  | 0.982                      |                  | 0.189                                     |
| <i>HTR3B</i> | rs3758987  | CC       | 6.52                     | 4.81   | 8.22  | 11  | 4.92                 | 3.00   | 6.83  | 9   | 1.60                               | -0.96  | 4.16  | 0.220                      |                  | 0.533                                     |
|              |            | CT       | 5.76                     | 4.9    | 6.62  | 51  | 6.32                 | 5.57   | 7.08  | 62  | -0.57                              | -1.65  | 0.52  | 0.306                      |                  | 0.322                                     |
|              |            | TT       | 5.73                     | 5.02   | 6.43  | 70  | 5.85                 | 5.14   | 6.56  | 69  | -0.13                              | -1.1   | 0.85  | 0.801                      |                  | 0.969                                     |
|              | rs11606194 | CC       | 0.08                     | -5.83  | 5.99  | 1   | 2.14                 | -3.45  | 7.74  | 1   | -2.07                              | -10.23 | 6.09  | 0.620                      |                  | 0.846                                     |
|              |            | CT       | 6.66                     | 5.13   | 8.18  | 14  | 5.66                 | 4.50   | 6.82  | 25  | 0.995                              | -0.90  | 2.89  | 0.302                      |                  | 0.450                                     |
|              |            | TT       | 5.71                     | 5.14   | 6.29  | 117 | 6.14                 | 5.58   | 6.7   | 114 | -0.43                              | -1.17  | 0.32  | 0.261                      |                  | 0.669                                     |
|              | rs4938056  | CC       | 6.56                     | 5.63   | 7.48  | 40  | 5.86                 | 5      | 6.71  | 47  | 0.70                               | -0.51  | 1.91  | 0.259                      |                  | 0.566                                     |
|              |            | CT       | 5.36                     | 4.61   | 6.1   | 62  | 6.23                 | 5.48   | 6.97  | 61  | -0.88                              | -1.9   | 0.15  | 0.095                      |                  | 0.645                                     |
|              |            | TT       | 5.86                     | 4.78   | 6.94  | 30  | 5.98                 | 4.94   | 7.02  | 31  | -0.12                              | -1.58  | 1.34  | 0.870                      |                  | 0.892                                     |
|              | rs12270070 | CC       | 3.3                      | -0.05  | 6.65  | 3   | 6.18                 | 4.07   | 8.3   | 7   | -2.88                              | -6.83  | 1.07  | 0.153                      |                  | 0.213                                     |
|              |            | CG       | 6.2                      | 5.34   | 7.06  | 48  | 5.83                 | 4.93   | 6.74  | 42  | 0.37                               | -0.83  | 1.57  | 0.548                      |                  | 0.147                                     |
|              |            | GG       | 5.64                     | 4.99   | 6.29  | 84  | 6.09                 | 5.47   | 6.71  | 91  | -0.45                              | -1.31  | 0.41  | 0.302                      |                  | 0.480                                     |
|              | rs1176746  | AA       | 5.44                     | 4.22   | 6.67  | 22  | 6.16                 | 5.01   | 7.31  | 25  | -0.72                              | -2.38  | 0.94  | 0.394                      |                  | 0.729                                     |
|              |            | AG       | 6.08                     | 5.27   | 6.9   | 54  | 5.87                 | 5.11   | 6.62  | 61  | 0.22                               | -0.85  | 1.28  | 0.696                      |                  | 0.690                                     |
|              |            | GG       | 5.65                     | 4.87   | 6.44  | 59  | 6.12                 | 5.31   | 6.92  | 54  | -0.47                              | -1.54  | 0.61  | 0.398                      |                  | 0.405                                     |
|              | rs1176744  | AA       | 6.14                     | 5.4    | 6.87  | 65  | 6.08                 | 5.37   | 6.78  | 70  | 0.05                               | -0.92  | 1.04  | 0.909                      |                  | 0.939                                     |
|              |            | AC       | 5.37                     | 4.56   | 6.18  | 56  | 6.01                 | 5.20   | 6.82  | 54  | -0.64                              | -1.72  | 0.45  | 0.249                      |                  | 0.608                                     |
|              |            | CC       | 5.38                     | 3.77   | 6.98  | 13  | 5.36                 | 3.88   | 6.84  | 15  | 0.02                               | -2.15  | 2.19  | 0.986                      |                  | 0.757                                     |
|              | rs2276307  | AA       | 5.65                     | 4.98   | 6.32  | 80  | 6.09                 | 5.39   | 6.78  | 77  | -0.44                              | -1.34  | 0.47  | 0.343                      |                  | 0.684                                     |
|              |            | AG       | 6.32                     | 5.44   | 7.19  | 46  | 5.9                  | 5.12   | 6.67  | 55  | 0.42                               | -0.72  | 1.56  | 0.473                      |                  | 0.549                                     |
|              |            | GG       | 4.35                     | 2.25   | 6.46  | 8   | 6.64                 | 4.65   | 8.64  | 8   | -2.29                              | -5.19  | 0.62  | 0.122                      |                  | 0.892                                     |

**TABLE S2. Continued**

| Gene | SNP        | Genotype | DDD in Ondansetron Group |        |       |     | DDD in Placebo Group |        |       |     | Ondansetron vs. Placebo Comparison |        |       |                            |                  |                                           |
|------|------------|----------|--------------------------|--------|-------|-----|----------------------|--------|-------|-----|------------------------------------|--------|-------|----------------------------|------------------|-------------------------------------------|
|      |            |          | Estimate                 | 95% CI |       | N   | Estimate             | 95% CI |       | N   | Estimate                           | 95% CI |       | p-Value for DDD Difference | FDR <sup>b</sup> | p-Value for Genotype Frequency Difference |
|      |            |          |                          | Lower  | Upper |     |                      | Lower  | Upper |     |                                    | Lower  | Upper |                            |                  |                                           |
|      | rs1672717  | AA       | 5.54                     | 4.75   | 6.33  | 57  | 6.19                 | 5.39   | 7     | 53  | -0.65                              | -1.73  | 0.43  | 0.236                      |                  | 0.414                                     |
|      |            | AG       | 5.54                     | 4.78   | 6.29  | 62  | 5.76                 | 5.05   | 6.48  | 66  | -0.23                              | -1.22  | 0.77  | 0.655                      |                  | 0.813                                     |
|      |            | GG       | 7.4                      | 6.03   | 8.76  | 17  | 6.37                 | 5.15   | 7.60  | 21  | 1.03                               | -0.79  | 2.84  | 0.269                      |                  | 0.640                                     |
|      | rs17614942 | AC       | 3.86                     | 2.49   | 5.22  | 17  | 6.59                 | 5.31   | 7.88  | 19  | -2.73                              | -4.6   | -0.87 | 0.004                      | 0.156            | 0.896                                     |
|      |            | AA       | 5.58                     | 0.03   | 11.13 | 1   | 4.04                 | -1.65  | 9.73  | 1   | 1.54                               | -6.38  | 9.47  | 0.703                      |                  | 0.964                                     |
|      |            | CC       | 6.09                     | 5.52   | 6.66  | 117 | 5.97                 | 5.42   | 6.53  | 119 | 0.12                               | -0.61  | 0.84  | 0.757                      |                  | 0.958                                     |

<sup>a</sup> Genetic polymorphisms that were associated with more than 1.5 drinks/drinking day difference between the ondansetron and placebo groups, and that had more than five subjects within each treatment group, are enclosed within boxes. SNP=single-nucleotide polymorphism; DDD=drinks per drinking day; CI=confidence interval; FDR=false discovery rate.

<sup>b</sup>As mentioned in the Method section, FDR values were assessed only for the variants that survived the “screening process”.

**TABLE S3. Combinations of Genotypes Significantly Associated with the Primary Outcome Measure, Drinks per Drinking Day<sup>a</sup>**

| Combination | Genotype Combination                                                            | Population Carrying the Genotype Combination | Estimated Mean Difference for DDD (95% CI) and p-Value |
|-------------|---------------------------------------------------------------------------------|----------------------------------------------|--------------------------------------------------------|
| 1           | <i>SLC6A4</i> -LL/TT + <i>HTR3A</i> -rs1176713-GG                               | O=3<br>P=3<br>(2%)                           | -7.64<br>(-12.65 to -2.63)<br>0.003                    |
| 2           | <i>SLC6A4</i> -LL/TT + <i>HTR3B</i> -rs17614942-AC                              | O=6<br>P=4<br>(4%)                           | -4.25<br>(-7.87 to -0.63)<br>0.021                     |
| 3           | <i>SLC6A4</i> -LL/TT + <i>HTR3A</i> -rs1150226-AG + <i>HTR3B</i> -rs17614942-AC | O=4<br>P=3<br>(3%)                           | -4.05<br>(-8.41 to 0.31)<br>0.069                      |
| 4           | <i>SLC6A4</i> -LL/TT + <i>HTR3A</i> -rs1150226-AG                               | O=5<br>P=3<br>(3%)                           | -3.92<br>(-8.09 to 0.26)<br>0.066                      |

<sup>a</sup> All comparisons are between the ondansetron and placebo groups and are listed in descending order of magnitude of their drinks per drinking day reductions; mean differences for DDD are in standard drinks; negative values indicate improvement from baseline. DDD=drinks per drinking day; CI=confidence interval; O=ondansetron; P=placebo.
